# Supplementary material for: TcbZIP60 positively regulates pyrethrins biosynthesis in Tanacetum cinerariifolium
Source: Front Plant Sci. 2023 Feb 20;14:1133912. doi: 10.3389/fpls.2023.1133912 (PMC9986458; doi:10.3389/fpls.2023.1133912)
Supplement: Supplementary file 1 [file DataSheet_1.xlsx]

## Sheet: Fig 4
		Fig 4D（Left）							Fig 4D（Right）
			Fig 4B

## Sheet: Fig5
				Fig 5 HPLC for n-hexane
				Fig 5 HPLC for pyrethrins-standard
				Fig 5 HPLC for OE-Mock
				Fig 5 HPLC for OE-TcbZIP60
				Fig 5 HPLC for VIGS-Mock
				Fig 5 HPLC for VIGS-TcbZIP60
